# Supplementary material for: Adolescents with current major depressive disorder show dissimilar patterns of age-related differences in ACC and thalamus
Source: PubMed Central journal article supplement (PMC4309951; doi:10.1016/j.nicl.2014.12.019), 2015-01-07
Supplement: mmc1.pdf [file mmc1.pdf]

**Table S1.** Brain regions showing statistically significant differences in grey matter volume between the depressed group and healthy control group in the ACC ROI and across the whole-brain. Clusters larger than 20 voxels and surviving  $p < 0.05$  FWE correction for multiple comparisons are reported. Coordinates represent the maximum intensity voxel of the cluster in MNI standard space. The brain locations of coordinates are designated using the Harvard-Oxford Cortical and Subcortical Structural Atlases.

| Grey Matter Comparison                | # of voxels | <i>p</i> -value | MNI Coordinates | Brain region                 |
|---------------------------------------|-------------|-----------------|-----------------|------------------------------|
| <b>ACC ROI</b>                        |             |                 |                 |                              |
| Depressed>Control                     | -           | n.s.            | -               | -                            |
| Control>Depressed                     | -           | n.s.            | -               | -                            |
| Age Depressed>Age Control             | 583         | <0.004          | 0, 34, 6        | Anterior cingulate gyrus     |
| Age Control>Age Depressed             | -           | n.s.            | -               | -                            |
| Positive relationship with Age        | -           | n.s.            | -               | -                            |
| Negative relationship with Age        | 35          | <0.003          | -2, 52, 2       | Left paracingulate gyrus     |
| <b>Whole-brain</b>                    |             |                 |                 |                              |
| Depressed>Control                     | -           | n.s.            | -               | -                            |
| Control>Depressed                     | -           | n.s.            | -               | -                            |
| Age Depressed>Age Control             | -           | n.s.            | -               | -                            |
| Age Control>Age Depressed             | 28          | 0.037           | 10, -22, 20     | Right thalamus               |
| Positive relationship with Age        | -           | n.s.            | -               | -                            |
| Negative relationship with Age        | 4677        | 0.001           | 16, 28, -26     | Right orbital frontal cortex |
|                                       | 3223        | 0.001           | 10, -76, 40     | Right precuneus              |
|                                       | 2993        | 0.005           | -10, 30, 60     | Left superior frontal gyrus  |
|                                       | 2173        | 0.002           | -52, -28, 42    | Left supramarginal gyrus     |
|                                       | 715         | 0.008           | 42, 32, 20      | Right middle frontal gyrus   |
| MNI = Montreal Neurological Institute |             |                 |                 |                              |
| n.s. = no significant results         |             |                 |                 |                              |
